# Supplementary material for: Binary mono-anions with unprecedented anti-aromatic planar tetracoordinate carbon and nitrogen atoms
Source: Royal Society of Chemistry journal article supplement (doi:10.1039/d2cp01496c), 2022-01-01
Supplement: d2cp01496c1.pdf [file d2cp01496c1.pdf]

Electronic Supplementary Information

**Binary mono-anions with unprecedented anti-aromatic planar  
tetracoordinate carbon and nitrogen atoms**

Bo Jin,\* and Zai-Ran Wang

Institute of Molecular Science, Shanxi University, Taiyuan, Shanxi 030006, People's Republic of  
China.

\*To whom correspondence should be addressed.

E-mail: [201722802002@email.sxu.edu.cn](mailto:201722802002@email.sxu.edu.cn)(B. J.)

Contents

**SI1:** The results for the relative energies, the Iso-chemical shielding surfaces analysis, the NICS<sub>zz</sub> values of benzene, and the simulated PES spectra of **1–2**

**Fig. S1.** The relative energies of CBe<sub>4</sub><sup>-</sup> (**1**), NBe<sub>4</sub><sup>-</sup> (**2**), and the concerned isomers by considering multi-reference configuration interaction (MRCI).

**Fig. S2.** Iso-chemical shielding surfaces (ICSSs, isovalue = ±1.0 ppm) of **1–2**.

**Fig. S3.** The NICS<sub>zz</sub> values of benzene.

**Fig. S4.** Simulated PES spectra of CBe<sub>4</sub><sup>-</sup> (**1**) and NBe<sub>4</sub><sup>-</sup> (**2**)

**SI2:** Cartesian coordinates of B3LYP/aug-cc-pVTZ-optimized structures shown in Fig.  
**1**

**S11:** The results for the relative energies, the Iso-chemical shielding surfaces analysis, the NICS<sub>zz</sub> values of benzene, and the simulated PES spectra of 1–2.

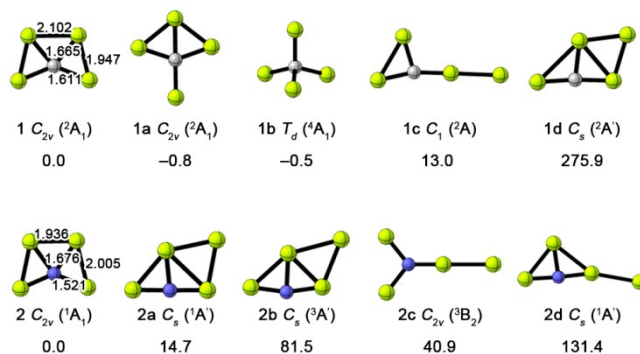

**Fig. S11.** The structures of  $\text{CBe}_4^-$  (**1**),  $\text{NBe}_4^-$  (**2**), and the concerned isomers. The relative energies ( $\Delta E$ , in  $\text{kcal mol}^{-1}$ ) are reported by considering multi-reference configuration interaction (MRCI).

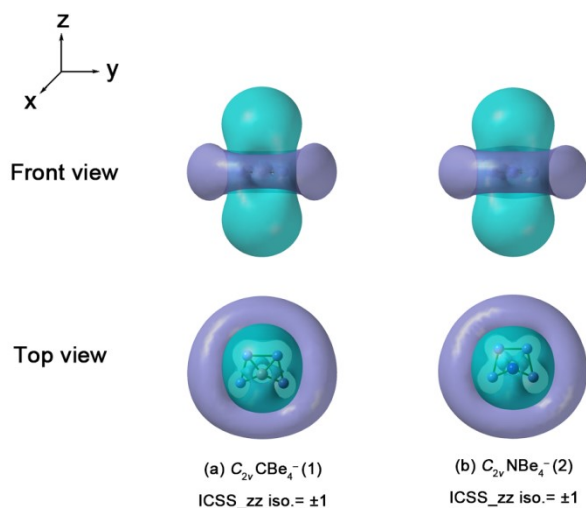

**Fig. S12.** Iso-chemical shielding surfaces (ICSSs, isovalue =  $\pm 1.0$  ppm) of 1–2. The chemical shielding and de-shielding areas are shown in purple and cyan, respectively.

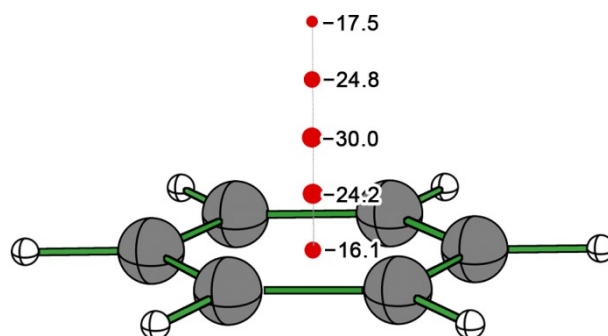

**Fig. S13.** The NICS<sub>zz</sub> values of benzene. Along the vertical line, the NICS points (green, red balls) are 0.5 Å apart from their neighbors.

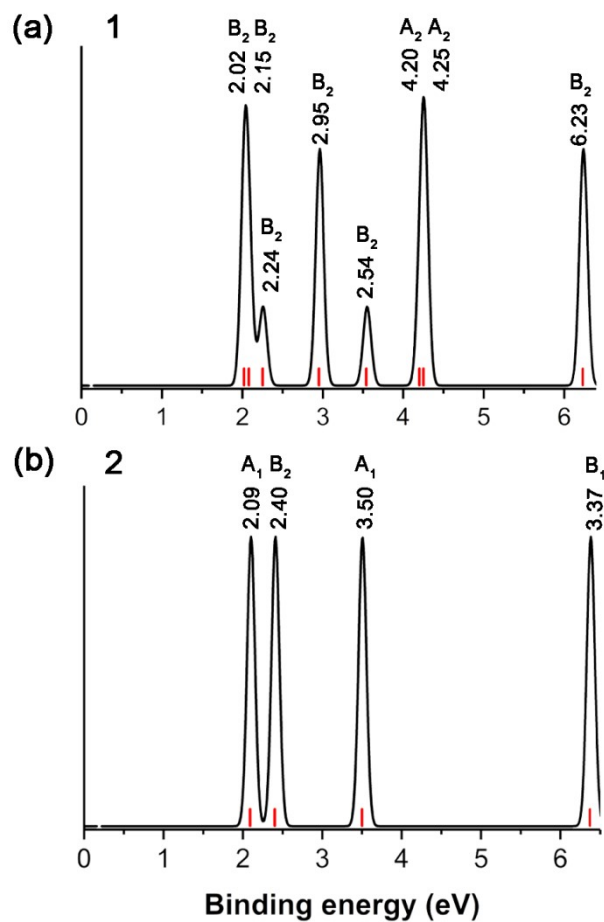

**Fig. S4.** Simulated PES spectra of CBe<sub>4</sub><sup>-</sup> (**1**) and NBe<sub>4</sub><sup>-</sup> (**2**) at the TD-B3LYP/aug-cc-pVTZ level, whose first VDEs were corrected using CCSD(T)/aug-cc-pVTZ calculations. The adsorption curves were simulated by fitting the calculated VDEs (vertical bars) using unit-area Gaussian function with half width of 0.1 eV.

**SI2:** Cartesian coordinates of B3LYP/aug-cc-pVTZ-optimized structures shown in Fig.

1

**CBe<sub>4</sub><sup>-</sup> (1)**

|    |            |             |             |
|----|------------|-------------|-------------|
| C  | 0.00000000 | 0.00000000  | 0.24944900  |
| Be | 0.00000000 | 1.05095100  | -1.04172300 |
| Be | 0.00000000 | 1.49284800  | 0.85463700  |
| Be | 0.00000000 | -1.49284800 | 0.85463700  |
| Be | 0.00000000 | -1.05095100 | -1.04172300 |

**1a**

|    |            |             |             |
|----|------------|-------------|-------------|
| C  | 0.00000000 | 0.00000000  | 0.21950000  |
| Be | 0.00000000 | 1.52850800  | -0.30671500 |
| Be | 0.00000000 | -1.52850800 | -0.30671500 |
| Be | 0.00000000 | 0.00000000  | -1.51777300 |
| Be | 0.00000000 | 0.00000000  | 1.80195200  |

**1b**

|    |             |             |             |
|----|-------------|-------------|-------------|
| C  | 0.00000000  | 0.00000000  | 0.00000000  |
| Be | 0.94469500  | 0.94469500  | 0.94469500  |
| Be | -0.94469500 | -0.94469500 | 0.94469500  |
| Be | 0.94469500  | -0.94469500 | -0.94469500 |
| Be | -0.94469500 | 0.94469500  | -0.94469500 |

**1c**

|    |             |             |             |
|----|-------------|-------------|-------------|
| C  | -0.57505900 | -0.23553300 | -0.00006500 |
| Be | 3.11638100  | -0.03145000 | -0.00369400 |
| Be | -1.17019100 | 1.24086300  | -0.00057700 |
| Be | 0.99829100  | -0.14137100 | 0.00645300  |
| Be | -2.08189300 | -0.71474300 | -0.00208400 |

**1d**

|    |             |             |             |
|----|-------------|-------------|-------------|
| C  | -0.65817300 | 0.35558400  | 0.00007000  |
| Be | -2.11516800 | -0.24943900 | 0.00021300  |
| Be | 0.75449200  | 1.10313000  | -0.00026200 |
| Be | 2.12789300  | -0.36881300 | 0.00038300  |
| Be | 0.22004200  | -1.01825300 | -0.00043800 |

**NBe<sub>4</sub><sup>-</sup> (2)**

|    |             |             |             |
|----|-------------|-------------|-------------|
| Be | 1.41906600  | 0.84936900  | -0.00008300 |
| Be | 0.97476200  | -1.10364000 | 0.00007900  |
| Be | -0.97476200 | -1.10364000 | 0.00009900  |
| Be | -1.41906600 | 0.84936900  | -0.00005400 |
| N  | 0.00000000  | 0.29059500  | -0.00002300 |

**2a**

|    |             |             |            |
|----|-------------|-------------|------------|
| Be | 1.35365200  | 1.33205800  | 0.00000000 |
| Be | -1.35888000 | 0.04592300  | 0.00000000 |
| Be | -0.82849400 | -1.94700600 | 0.00000000 |
| Be | 0.83372300  | -0.66887200 | 0.00000000 |
| N  | 0.00000000  | 0.70737000  | 0.00000000 |

**2b**

|    |             |             |            |
|----|-------------|-------------|------------|
| N  | 0.00000000  | 0.83545000  | 0.00000000 |
| Be | -1.19149500 | -0.07229100 | 0.00000000 |
| Be | -0.90550700 | -2.17651200 | 0.00000000 |
| Be | 1.37651800  | 1.38158300  | 0.00000000 |
| Be | 0.72048400  | -0.59481800 | 0.00000000 |

**2c**

|    |            |             |             |
|----|------------|-------------|-------------|
| N  | 0.00000000 | 0.00000000  | 0.56000500  |
| Be | 0.00000000 | 1.19293300  | 1.50448300  |
| Be | 0.00000000 | -1.19293300 | 1.50448300  |
| Be | 0.00000000 | 0.00000000  | -0.92690800 |
| Be | 0.00000000 | 0.00000000  | -3.06206700 |

**2d**

|    |             |             |            |
|----|-------------|-------------|------------|
| N  | 0.00000000  | 0.64435500  | 0.00000000 |
| Be | 1.57372300  | -2.64865000 | 0.00000000 |
| Be | 0.40081600  | -0.80114600 | 0.00000000 |
| Be | -0.48064100 | 2.05256200  | 0.00000000 |
| Be | -1.49389800 | 0.26961300  | 0.00000000 |
